# Supplementary material for: Pharmacogenomic screening identifies and repurposes leucovorin and dyclonine as pro-oligodendrogenic compounds in brain repair
Source: PubMed Central journal article supplement (PMC11561360; doi:10.1038/s41467-024-54003-9), 2024-11-13
Supplement: 41467_2024_54003_MOESM1_ESM.pdf [file 41467_2024_54003_MOESM1_ESM.pdf]

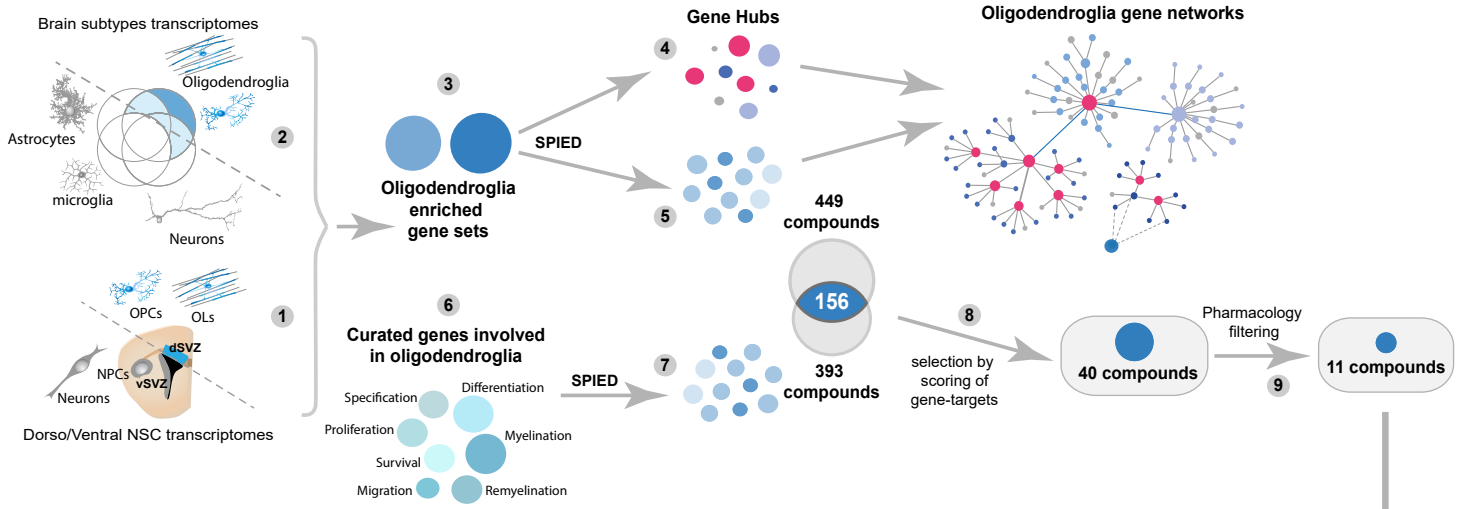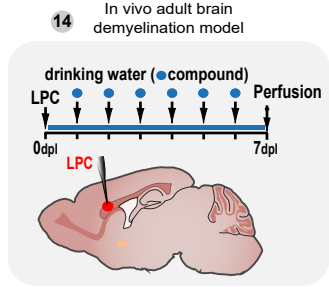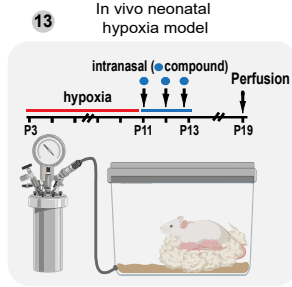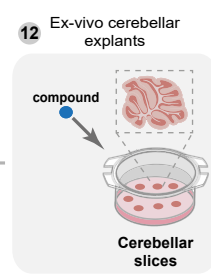

2 compounds

6 compounds

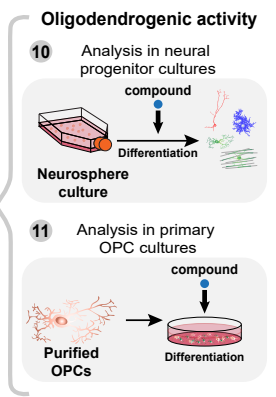

**Supplementary figure 1. Summary scheme of the screening strategy and compound selection process.** Schematics representing the in-silico (top) and wet-lab (bottom) strategies. In-silico bioinformatic strategy allowed the generation of a large oligodendroglial transcriptional signature (steps 1-3) and gene hubs of the oligodendroglial gene networks (step 4) used to generate a list of compounds with putative pro-oligodendrogenic and (re)myelinating activities (step 5). Compounds were ranked by their large pro-oligodendrogenic activities through expert curation of their regulated target genes (steps 6-8), and then by their pharmacological properties (step 9), with a final selection of the top 11 compounds. Wet-lab strategy to assess the pro-oligodendrogenic activity of the selected compounds in the culture of neural progenitor cells (step 10) and OPCs (step 11), resulting in 6 compounds being selected for further activity assessment in *ex vivo* cerebellar explant cultures (step 12). Finally, the top two compounds were used *in vivo* in a model of preterm birth injury (neonatal hypoxia, step 13) and a model of adult de/remyelination (step 14). Numbers in grey circles indicate the different steps of the project as detailed in the main text.

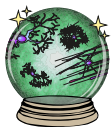

# OligoScore

<https://oligoscore.icm-institute.org/>

## Oligodendrogenesis curated gene list

Liste of genes involved in oligodendrogenesis (from the literature)

- Which process (Prolif, Diff...)?
- What impact (1, 2 or 3)?
- Which effect (Positive or Negative)?

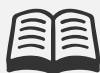

>1000 publications

>430 genes

|              | Specif    | Prolif    | Migrat    | Survival  | Differ     | Myelin     | Remyel    |
|--------------|-----------|-----------|-----------|-----------|------------|------------|-----------|
| Olig2        | 3         | 2         | 0         | 0         | 2          | 2          | 1         |
| Olig1        | 1         | -1        | 0         | 0         | 2          | 2          | 2         |
| Ascl1        | 2         | 1         | 0         | 0         | 2          | 0          | 1         |
| Pdgfra       | 1         | 3         | 0         | 0         | 0          | 0          | 0         |
| Mbp          | 1         | 0         | 0         | 0         | 1          | 2          | 0         |
| Gpr17        | 1         | 0         | 0         | -1        | 2          | -1         | -1        |
| ...          |           |           |           |           |            |            |           |
| <b>Total</b> | <b>29</b> | <b>75</b> | <b>42</b> | <b>21</b> | <b>162</b> | <b>221</b> | <b>50</b> |

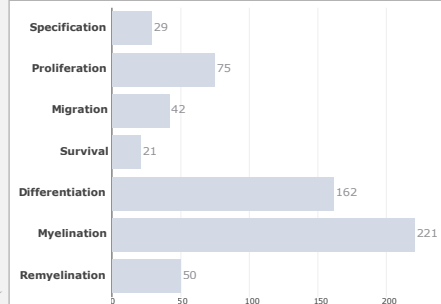

## 1- To assess the implication of genes in different processes of oligodendrogenesis

### Gene list (Selection)

|         |        |          |         |
|---------|--------|----------|---------|
| Aatk    | Enpp2  | Mal      | Serinc5 |
| Acox1   | Enpp6  | Mapk3    | Sirt2   |
| Acs2    | Ernm   | Marcks   | Sox10   |
| Adamts4 | Fa2h   | Mbp      | Sox8    |
| Aplp2   | Fabp7  | Mobp     | Sulf2   |
| Apoe    | Fasn   | Mog      | Thra    |
| App     | Fez1   | Myrf     | Tnr     |
| Aspa    | Fkbp1a | Ndr1     | Tns3    |
| Bcan    | Fth1   | Nfasc    | Tppp    |
| Bcas1   | Fyn    | Nkx6-2   | Tyro3   |
| Cadm4   | Gamt   | Olig1    | Ugt8a   |
| Cd9     | Gas7   | Olig2    | Unc5b   |
| Cdc42   | Gatm   | Omg      | Vamp2   |
| Cdk4    | Gipc1  | Opalin   |         |
| Cdk5    | Gjb1   | Pdgfra   |         |
| Ckb     | Gjc2   | Plat     |         |
| Cldn11  | Gnas   | Plekha1  |         |
| Cmtm5   | Gpr17  | Plp      |         |
| Cnp     | Gpr37  | Plp1     |         |
| Cntn1   | Gpr62  | Ppp1r16b |         |
| Cntn2   | Gpx1   | Psap     |         |
| Ctnnb1  | Gsn    | Ptn      |         |
| Ctsd    | Hdac11 | Ptprz1   |         |
| Cyp51   | Hexb   | Qk       |         |
| Ddx5    | Hmgcr  | Rac1     |         |
| Dusp15  | Kcnj10 | Rhoa     |         |
| Ednrb   | Lpar1  | Rnd2     |         |
| Efnb3   | Lrp1   | Rras2    |         |
| Eif1b   | Mag    | S1pr5    |         |

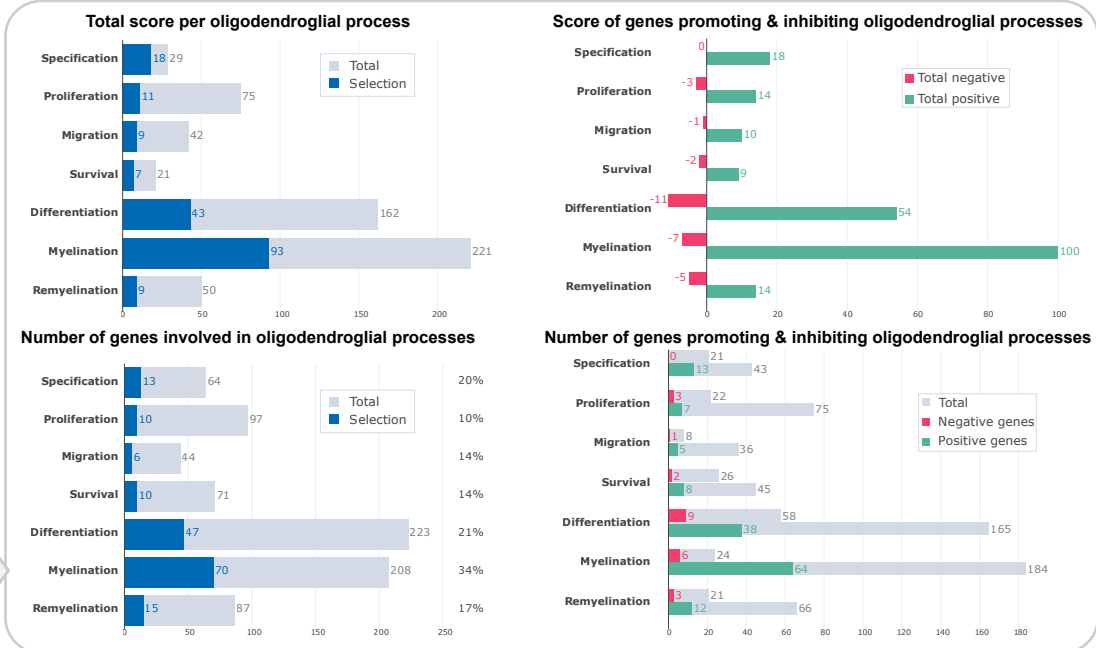

## 2- To evaluate the impact of a list of deregulated genes in different processes of oligodendrogenesis

### Deregulated genes

LogFC Mutant vs Ctrl

| Gene   | LogFC |
|--------|-------|
| Olig2  | -1,80 |
| Olig1  | -2,14 |
| Ascl1  | 0,56  |
| Pdgfra | -0,38 |
| Mbp    | -0,39 |
| Sox2   | 0,87  |
| Gpr17  | -1,15 |

Impact of each gene in each process

Score \* LogFC

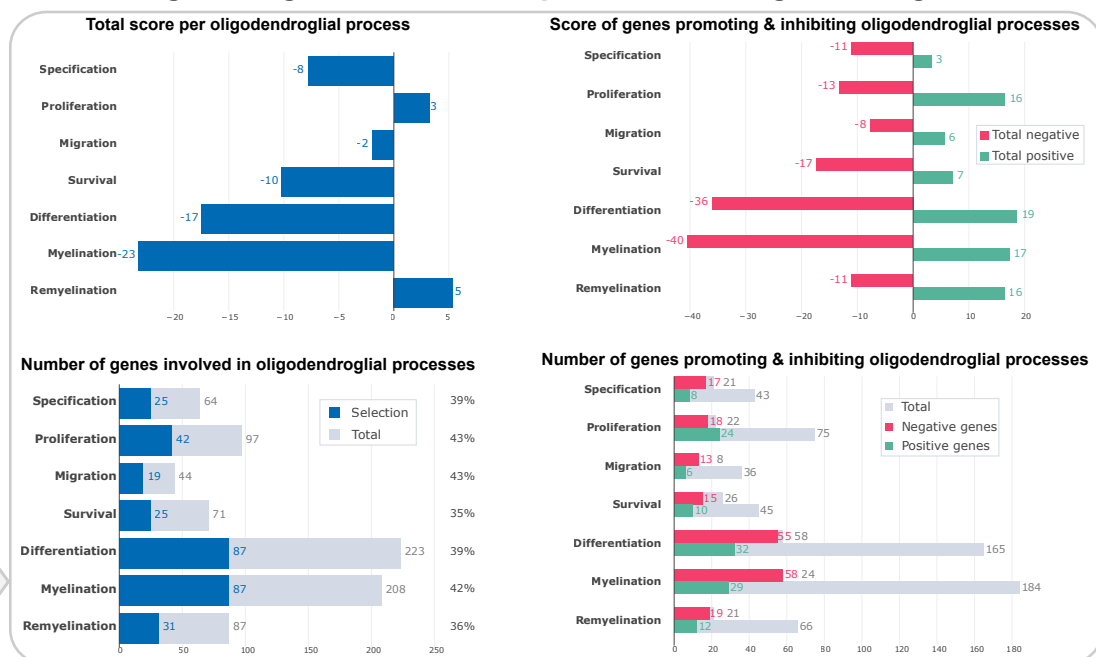

**Supplementary figure 2. OligoScore, a new web resource to evaluate gene sets for their involvement in oligodendrogenesis.** Schematics illustrating the OligoScore resource, a curation strategy currently encompassing over 430 genes and 1000 publications that report the functional implication (either by loss-of-function or gain-of-function experiments) of a given gene in each aspect (process) of oligodendrogenesis (i.e., specification, proliferation, migration, survival, differentiation, myelination, and remyelination). Detailed statistics obtained either from queries using either (1) a gene set (i.e., list of genes) or (2) a list of deregulated genes (i.e., genes and logarithmic fold-changes, logFC) are provided as barplots.

**a** OPC vs. mOLs (Top 2000 genes enriched in Zhang dataset)

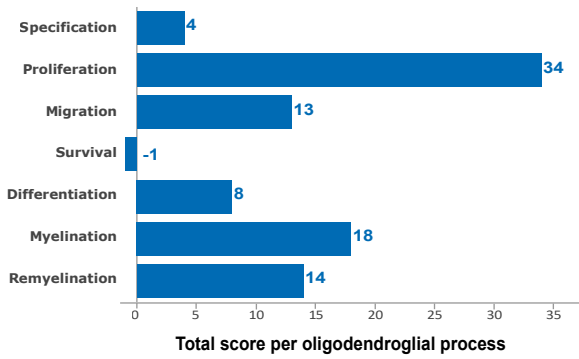

**b** mOLs vs. OPCs (Top 2000 genes enriched in Zhang dataset)

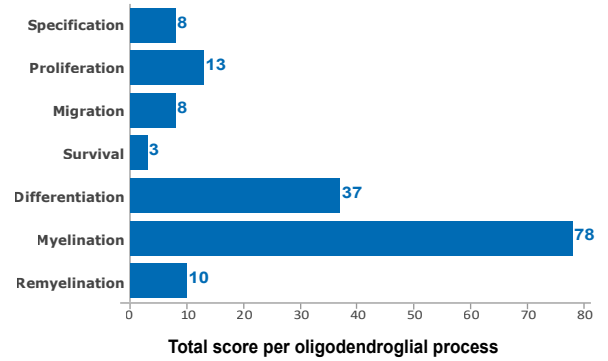

**c** OPC vs. mOLs (Top markers of Marques dataset; logFC > 0.5)

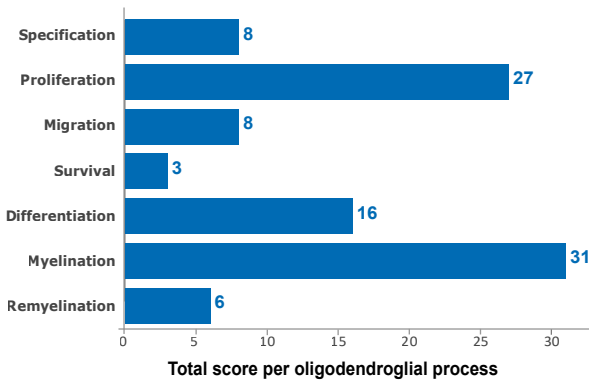

**d** mOLs vs. OPCs (Top markers of Marques dataset; logFC < -0.5)

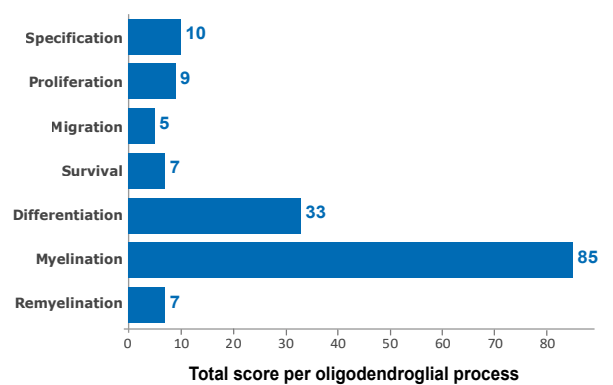

**e** OPCs from *Chd7* iKO vs. ctrl at P7

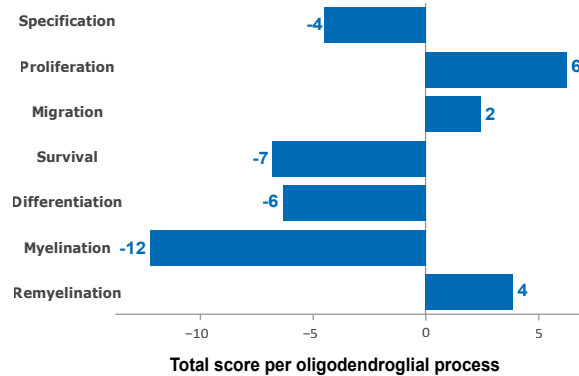

**f** OPCs from IL1 $\beta$  model vs. ctrl at P10

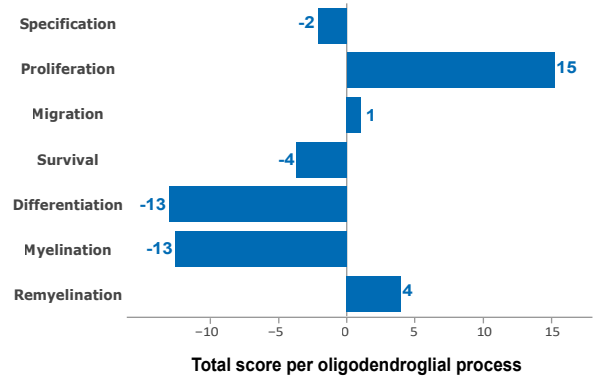

**Supplementary figure 3. OligoScore validation using expression and deregulated transcriptional signatures.** (a-d) Querying of OligoScore with genes enriched in OPC vs. myelinating OLs (mOLs), and vice versa, using either (a) postnatal purified brain cell transcriptomes (Zhang et al., 2024) or (c) oligodendroglial single-cells transcriptomes (Marques et al., 2016, 2018; see also Methods and *OligoScore\_validation\_tables* file). In both cases, OligoScore highlights that while OPC gene programs are involved in several processes of oligodendrogenesis, including specification, proliferation, migration, differentiation, and myelination (a, c), mOL-enriched genes are mainly involved in differentiation and myelination (b, d). (e, f) Querying OligoScore (genes and fold-changes) with genes dysregulated in OPCs upon a genetic (postnatal day 7 OPCs with an induced knockout for *Chd7*, compared to controls; Marie et al., 2018), or an environmental (P10 OPCs in the systemic IL1b-mediated neonatal neuroinflammatory model, Schang et al., 2022) perturbation. This analysis highlights the deregulated processes identified in these studies, such as reduced survival, and differentiation of *Chd7* iKO OPCs (e), and increased proliferation and reduced differentiation of OPCs in the IL1b-model (f).

# Sox10<sup>high</sup> cells

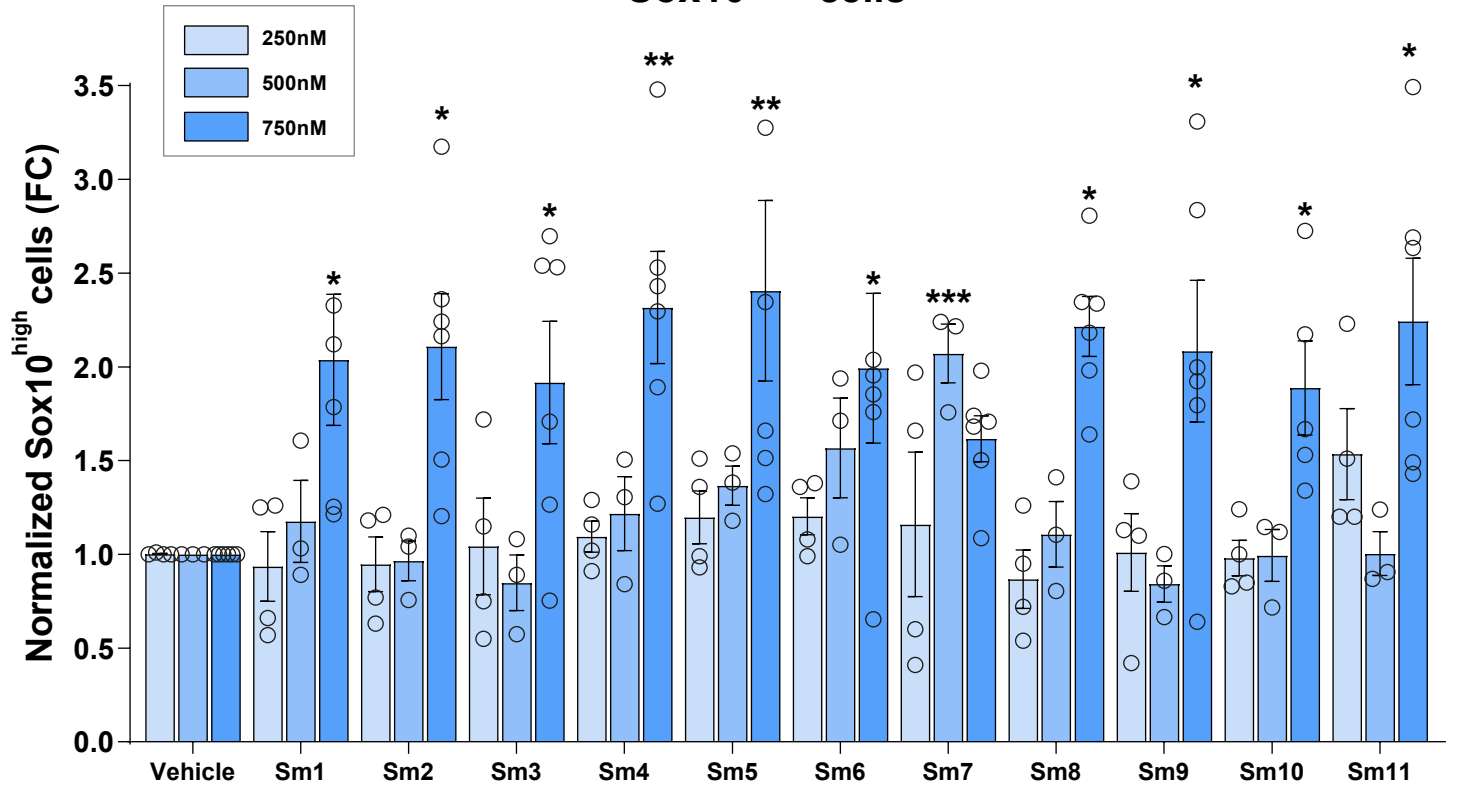

**Supplementary figure 4. Dose effect of compounds' pro-oligodendrogenic activity in neonatal neural progenitor cultures.** Quantifications of Sox10<sup>high</sup> cells (iOLs) in cultures treated with compounds at 250nM (N=4), 500nM (N=3), and 750nM (N=6), showing the best effect at 750nM. Data are presented as mean ± SEM of fold change normalized to vehicle. Statistical analysis used linear mixed-effects models followed by Type II Wald chi-square tests. Each dot represents a biological replicate. \*p < 0.05; \*\*p < 0.01; \*\*\*p < 0.001. Exact p-values, sample sizes (represented in the dot plots), and source data are provided in the Source Data file and in Methods Table 3.



PDGFR $\alpha$  / MBP / DAPI

Mask DAPI

Mask DAPI+PDGFR $\alpha$  cells

Mask DAPI+MBP+ cells

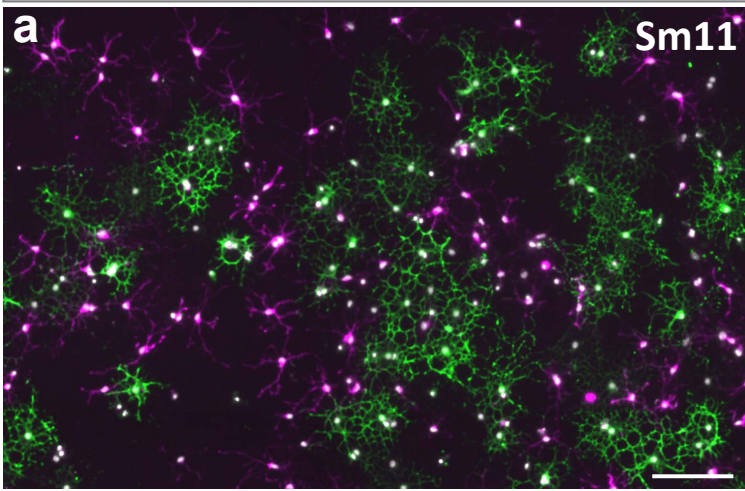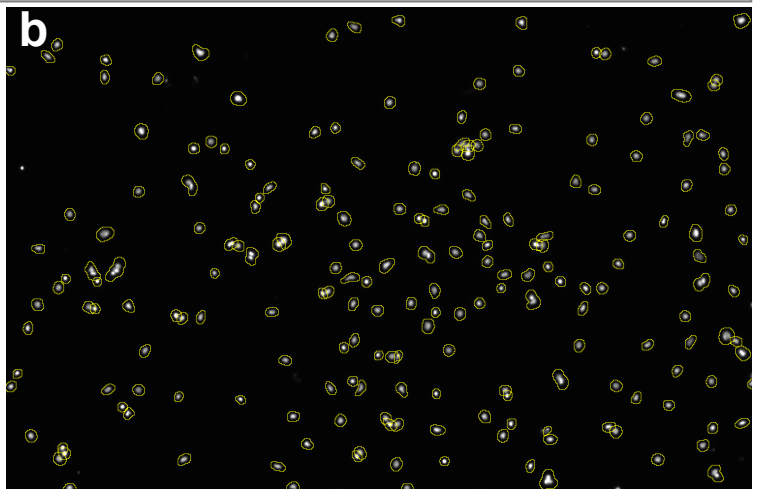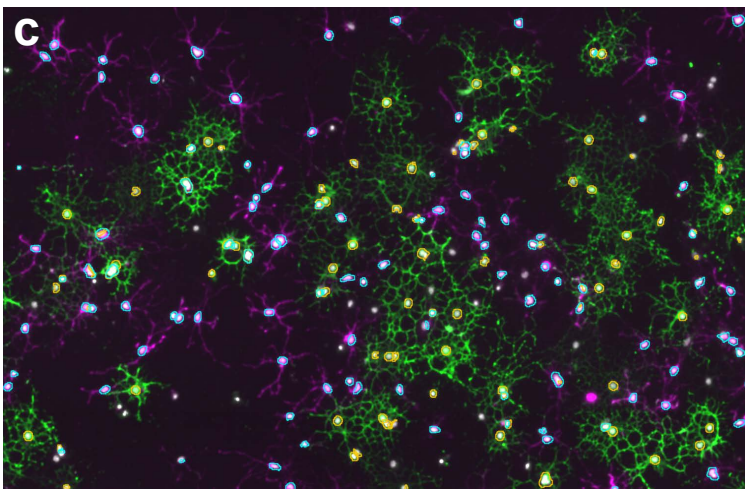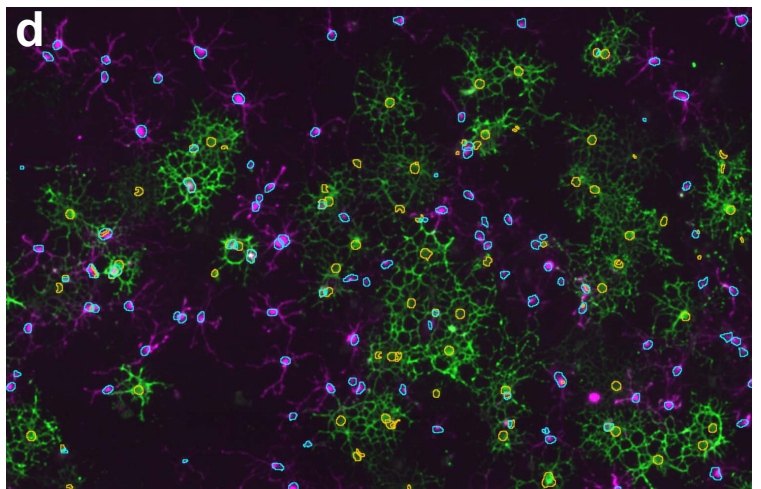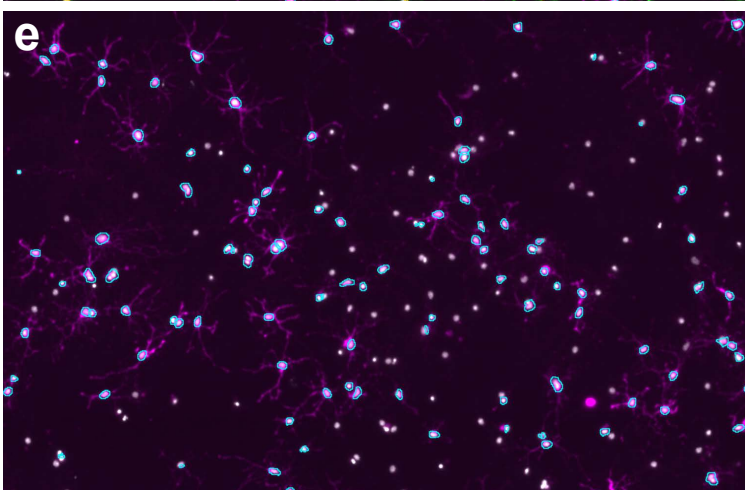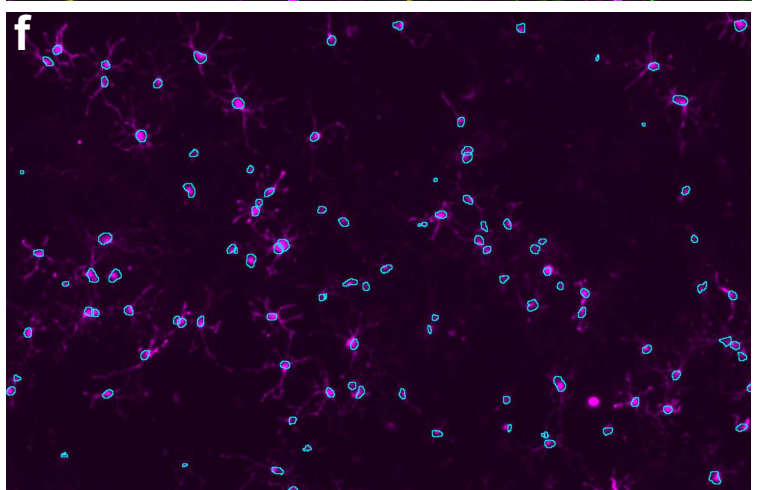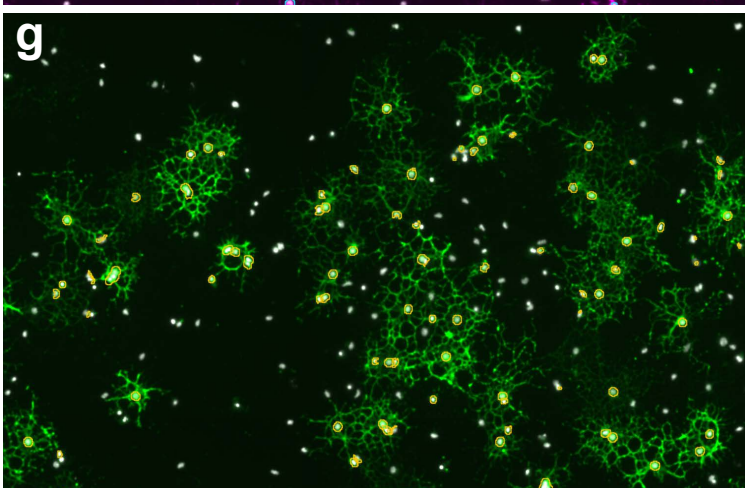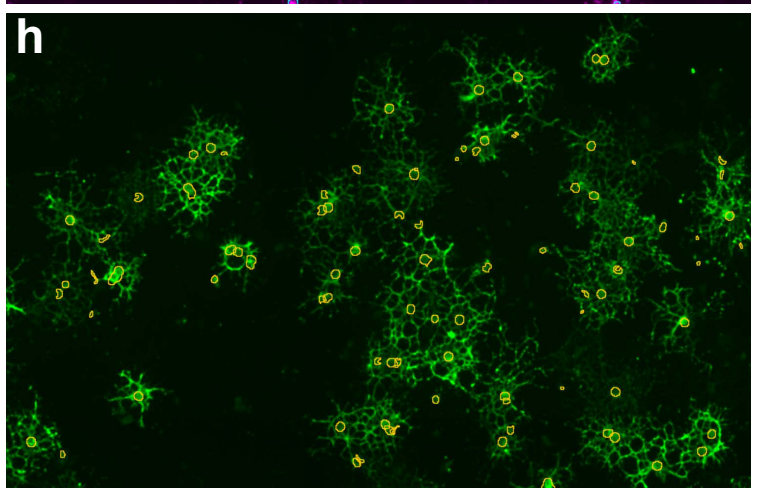

**Supplementary figure 5. Automatic quantification of OPC differentiation cultures.** (a) Representative image illustrating the immunodetection of OPCs (PDGFR $\alpha$ <sup>+</sup> cells, magenta) and differentiating OLs (MBP<sup>+</sup> cells, green) together with nuclear DAPI staining (grey) from OPC differentiation cultures, used to illustrate the automatic segmentation and quantification shown in the following panels. (b) Image illustrating with yellow masks the segmentation of DAPI nuclei (grey) used for automatic quantification. (c-h) Images illustrating with cyan masks the automatic identification of OPCs, DAPI nuclei having PDGFR $\alpha$  labeling (magenta), and with orange marks the identification of OLs, DAPI nuclei having MBP labeling (green), shown with (c, e, g) or without the DAPI channel (d, f, h), and showing PDGFR $\alpha$  and MBP labeling together (c, d) or as separate channels (e-h) to facilitate mask visualization. Scale bars: 20  $\mu$ m.

**a**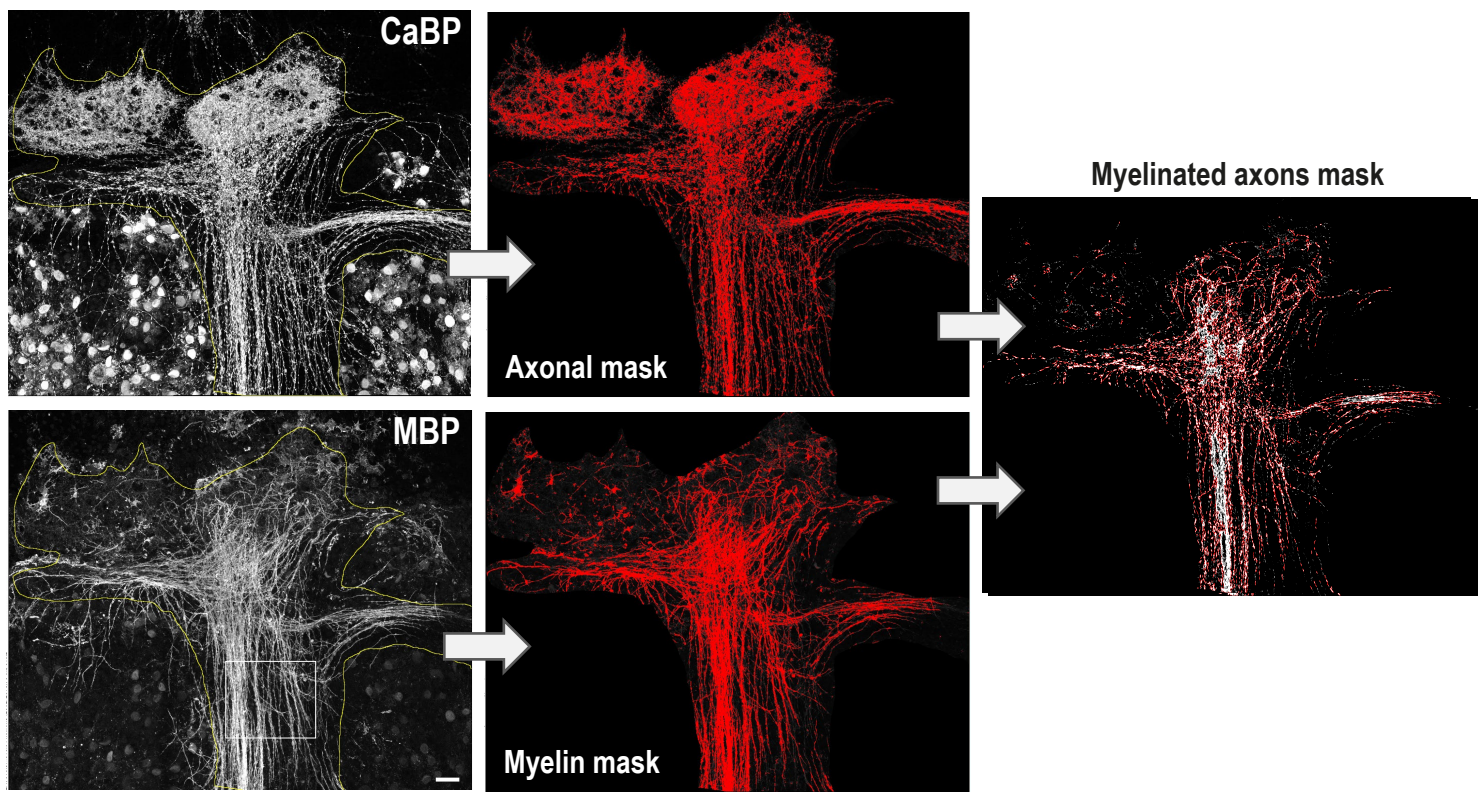**b**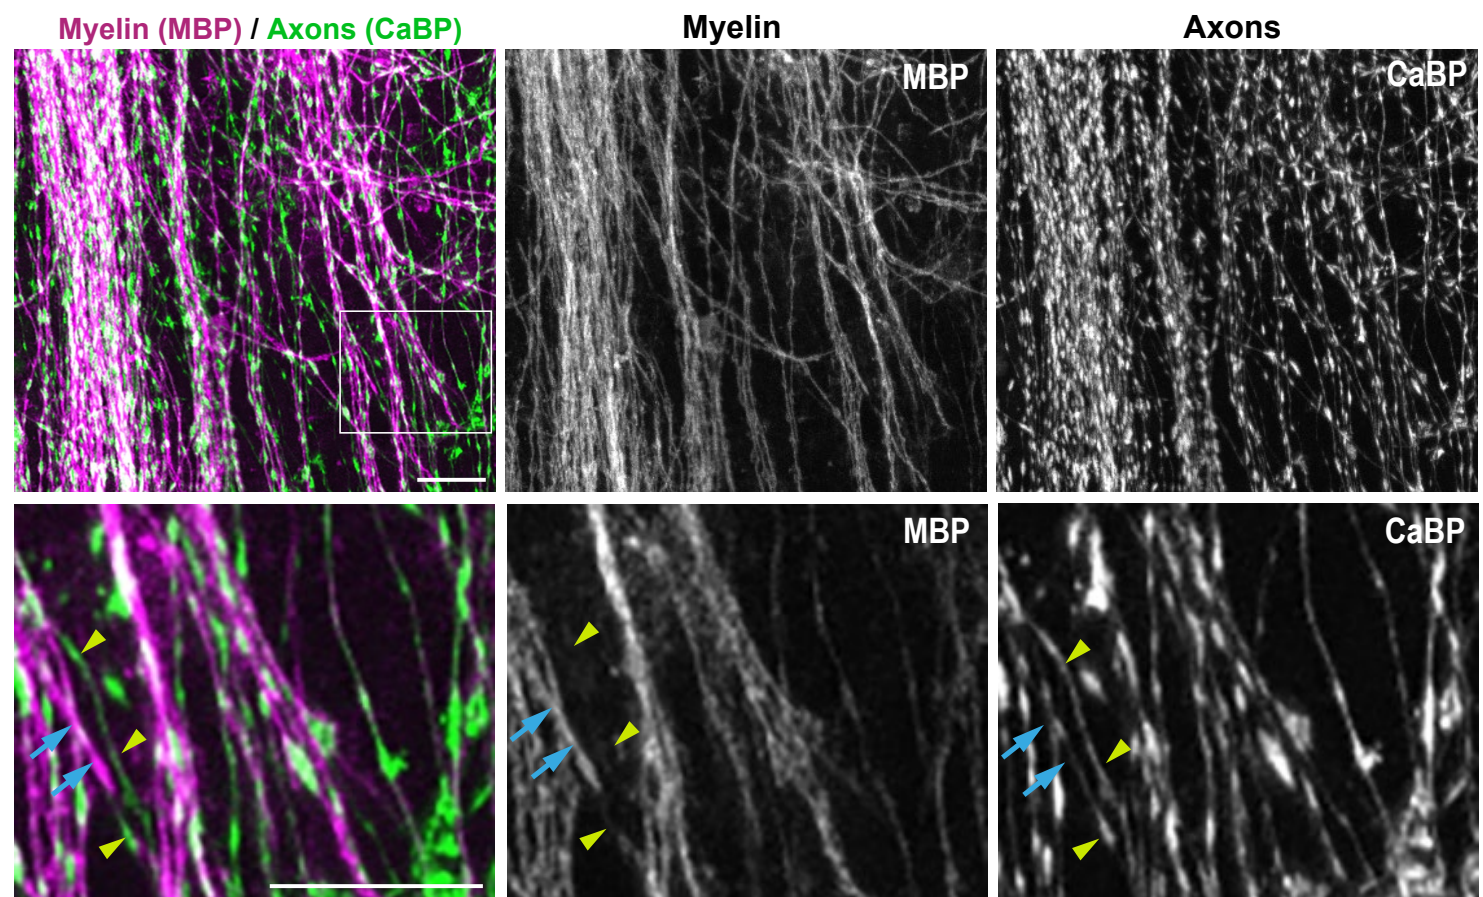**c**

|      | Neonatal neural progenitors cultures |                                      |                   |                        |                     |              | OPC cultures                    | Organotypic cerebellar slices                           |                                     | Rank | Scale   |
|------|--------------------------------------|--------------------------------------|-------------------|------------------------|---------------------|--------------|---------------------------------|---------------------------------------------------------|-------------------------------------|------|---------|
|      | iOLs diff                            | Oligodendroglia                      | Astrocyte         | Neuron                 | Cell diff           | Cell density | OL morphology                   | Differentiation                                         | Myelination                         |      |         |
|      | SOX10 <sup>+</sup>                   | PDGFRα <sup>+</sup> CNP <sup>+</sup> | GFAP <sup>+</sup> | β-III-tub <sup>+</sup> | marker <sup>+</sup> | DAPI         | Cell surface (μm <sup>2</sup> ) | SOX10 <sup>+</sup> CC1 <sup>+</sup> /SOX10 <sup>+</sup> | CaBP <sup>+</sup> /MBP <sup>+</sup> |      |         |
| Sm5  | 2.41                                 | 1.63                                 | 0.91              | 1.41                   | 1.54                | 0.74         | 2.05                            | 1.67                                                    | 1.72                                | 1    | >2      |
| Sm11 | 2.24                                 | 1.47                                 | 0.86              | 1.65                   | 1.43                | 1.01         | 2.04                            | 1.30                                                    | 1.84                                | 2    | 1.5-2   |
| Sm2  | 2.11                                 | 1.48                                 | 1.08              | 1.29                   | 1.61                | 0.86         | 1.69                            | 1.83                                                    | 1.59                                | 3    | 0.9-1.1 |
| Sm1  | 2.04                                 | 1.50                                 | 0.93              | 1.15                   | 1.35                | 0.87         | 1.83                            | 1.59                                                    | 1.47                                | 4    | 0.6-0.9 |
| T3   | 2.37                                 | 1.08                                 | 0.89              | 1.15                   | 1.5                 | 0.82         | 1.44                            | 1.07                                                    | 1.81                                | 5    |         |
| Sm7  | 1.62                                 | 1.46                                 | 1.05              | 1.14                   | 1.36                | 0.95         | 1.37                            | 1.48                                                    | 1.12                                | 6    |         |
| Sm6  | 1.99                                 | 1.55                                 | 1.04              | 0.90                   | 1.40                | 0.96         | 1.37                            | 1.34                                                    | 1.35                                | 7    |         |
| Clem | 0.91                                 | 1.25                                 | 1.14              | 0.98                   | 1.05                | 0.69         | NA                              | 1.67                                                    | 1.26                                | 8    |         |

**Supplementary figure 6. Automatic quantification of differentiation and myelination index in ex vivo cerebellar cultures, with a ranking of selected drugs for their pro-oligodendrogenic effects.** (a) Illustration images of the automatic quantification approach to obtain the myelinating index (as optimized in Baudouin et al., 2021). (b) High magnification images illustrating the overlap between myelin, MBP immunodetection (magenta), and Purkinje neuronal axon immunodetected with CaBP antibody (green). Examples of myelinated- (blue arrows) and non-myelinated (yellow arrowheads) axonal segments are indicated in the lower panels. (c) Table integrating and ranking the effects of selected compounds on oligodendrogenesis. Biological effects of the small molecules and positive controls (T3, clemastine) determined through *in vitro* and *ex vivo* systems allow ranking them for their pro-oligodendrogenic activity to select the top two candidates for *in vivo* analysis. Data are presented as fold change compared to their respective vehicle. Diff, differentiation; NA, not assessed; Clem, clemastine. Scale bars: 20  $\mu\text{m}$  in a panel, 10  $\mu\text{m}$  in b panels.

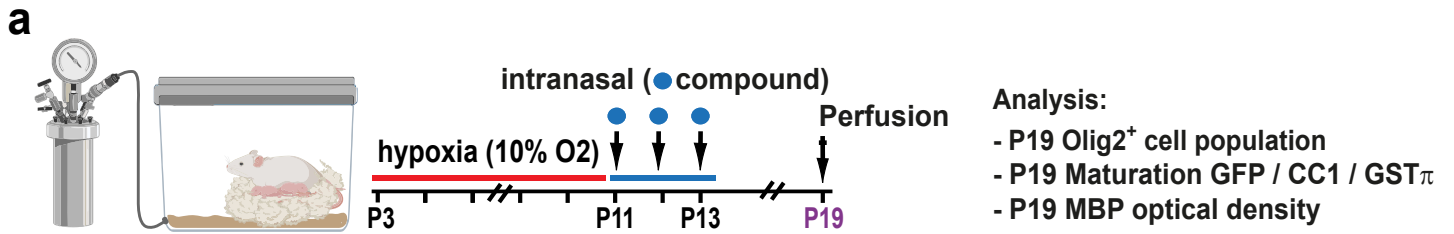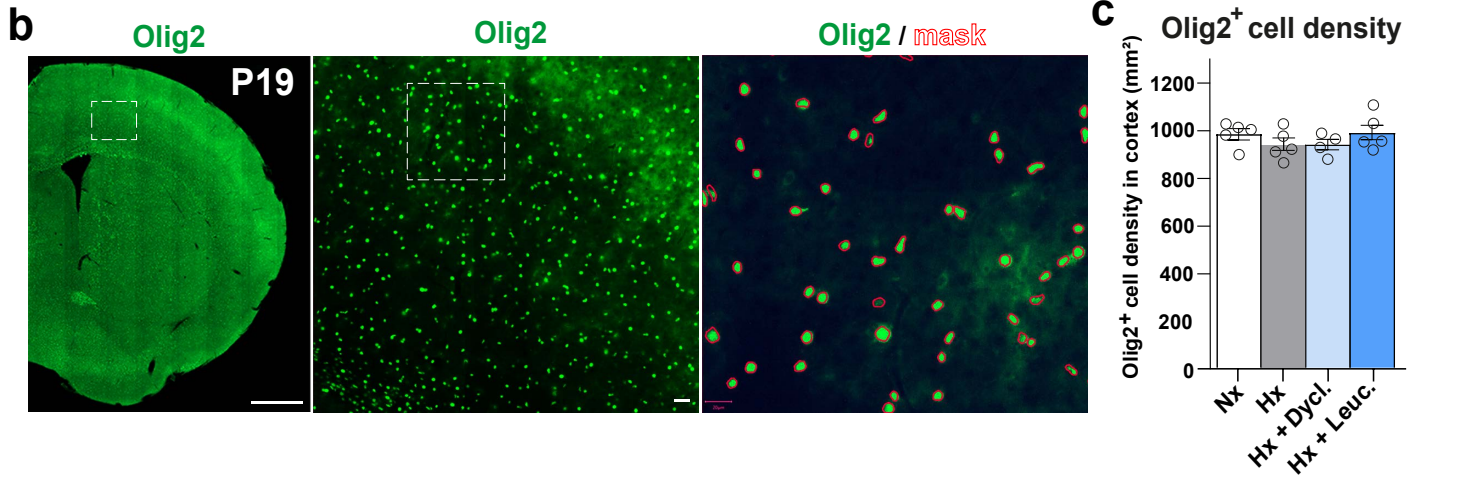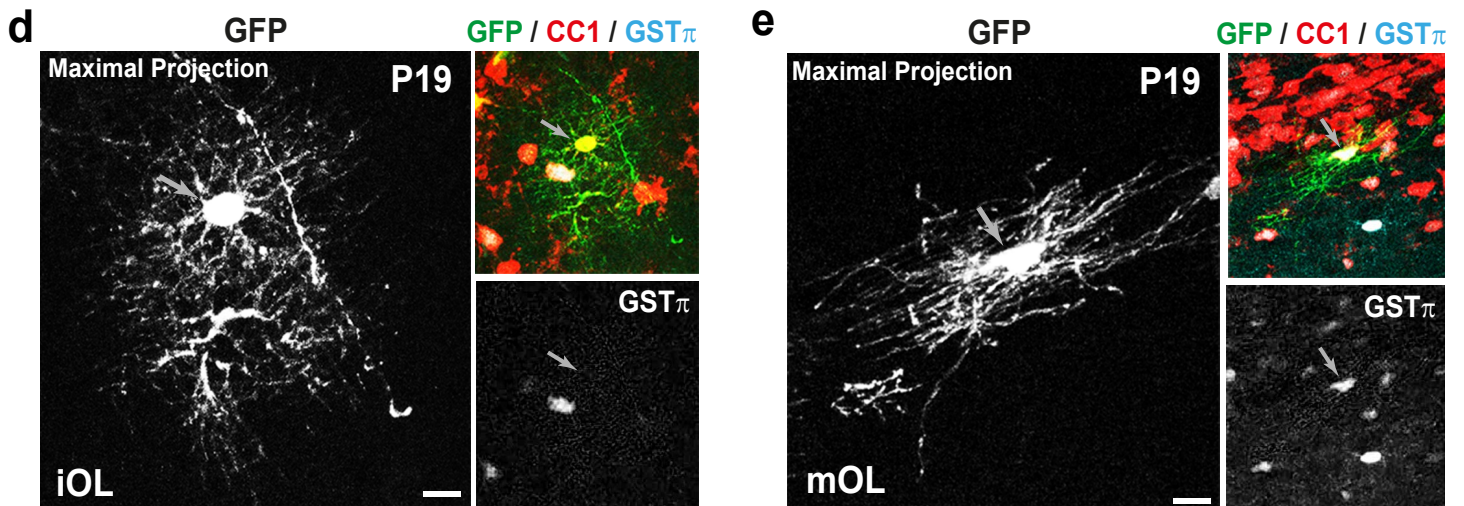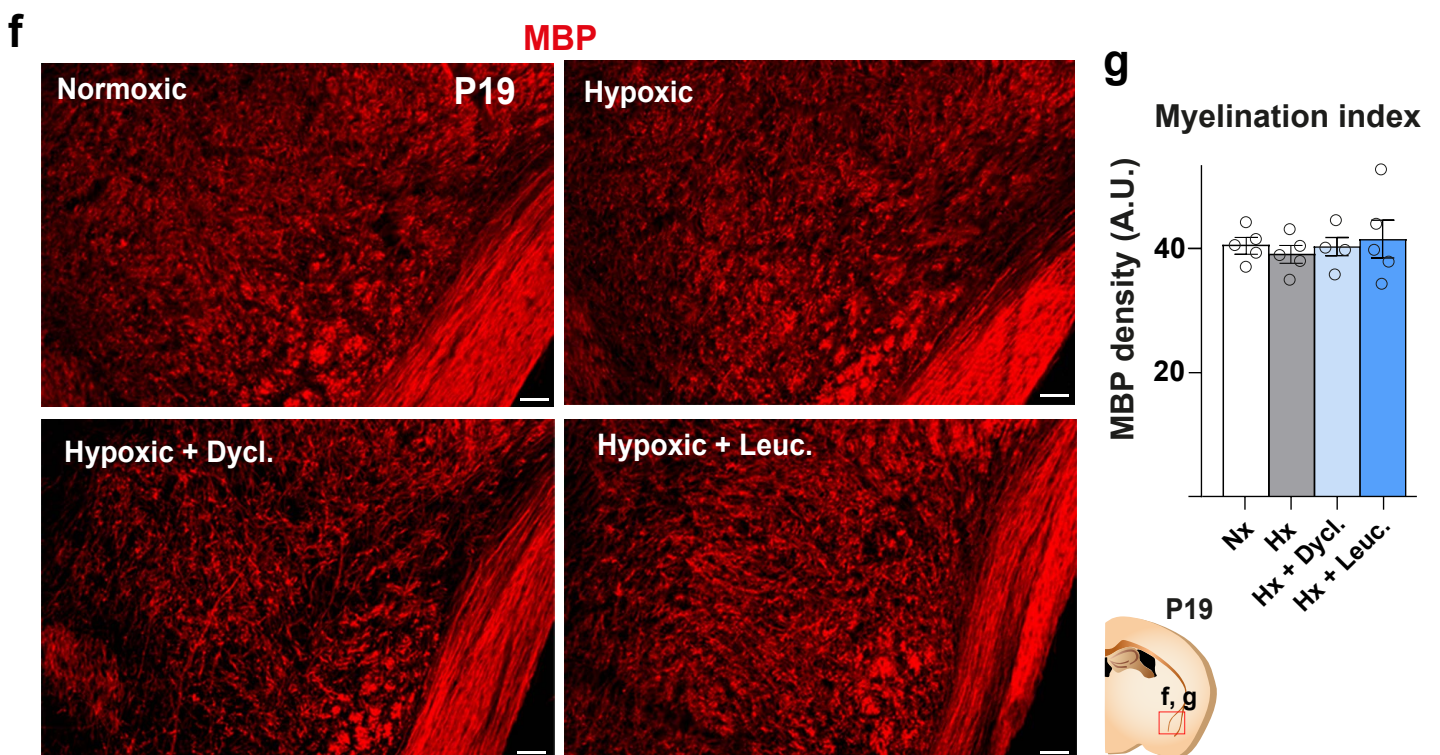

**Supplementary figure 7. Dyclonine and leucovorin promote oligodendroglial regeneration in a mouse model of preterm birth brain injury.** (a) Schematic illustrating the workflow used to assess the capacity of dyclonine and leucovorin to promote OPC proliferation and rescue OLs maturation following neonatal chronic hypoxia. (b, c) Olig2 immunodetection and quantification showing that the density of OLs is not changed by hypoxia nor by treatment within the cortex at P19 (c). Quantification was performed via automated detections (QPath) as illustrated by the mask used for cellular segmentation in the third illustration (mask). (d, e) Illustrations validating the use of CC1 and GST $\pi$  markers to identify OLs and mature/myelinating OLs respectively. Note that during OL differentiation, immature OLs (labeled with GFP) present a stellar morphology and are positive for CC1 but not for GST $\pi$  (d), while mature/myelinating OLs having myelin segments co-express CC1 and GST $\pi$  (e). (f, g) Representative images illustrating myelination by MBP immunodetection in the hypothalamic lateral zone, showing no difference between groups at P19 (f) and quantification of MBP immunofluorescence in this zone is represented in arbitrary units (A.U.) (g). Data are presented as Mean  $\pm$  SEM. Statistics were performed using One-way ANOVA to compare the cell counts across different treatments followed by Dunnett's test to compare each treatment with either Normoxia (Nx) or Hypoxia considered as control groups. Each dot corresponds to a biological replicate. Exact p-values, sample sizes (represented in the dot plots), and source data are provided in the Source Data file and in Methods Table 3. Scale bars: 100  $\mu$ m in b left panel, 20  $\mu$ m in b right panels, and f; e; 4  $\mu$ m in d and e.

**a**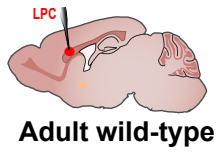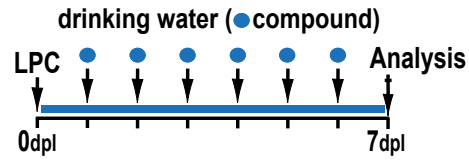**b**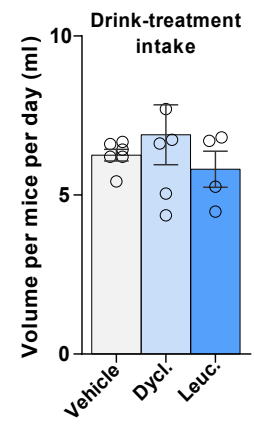**c**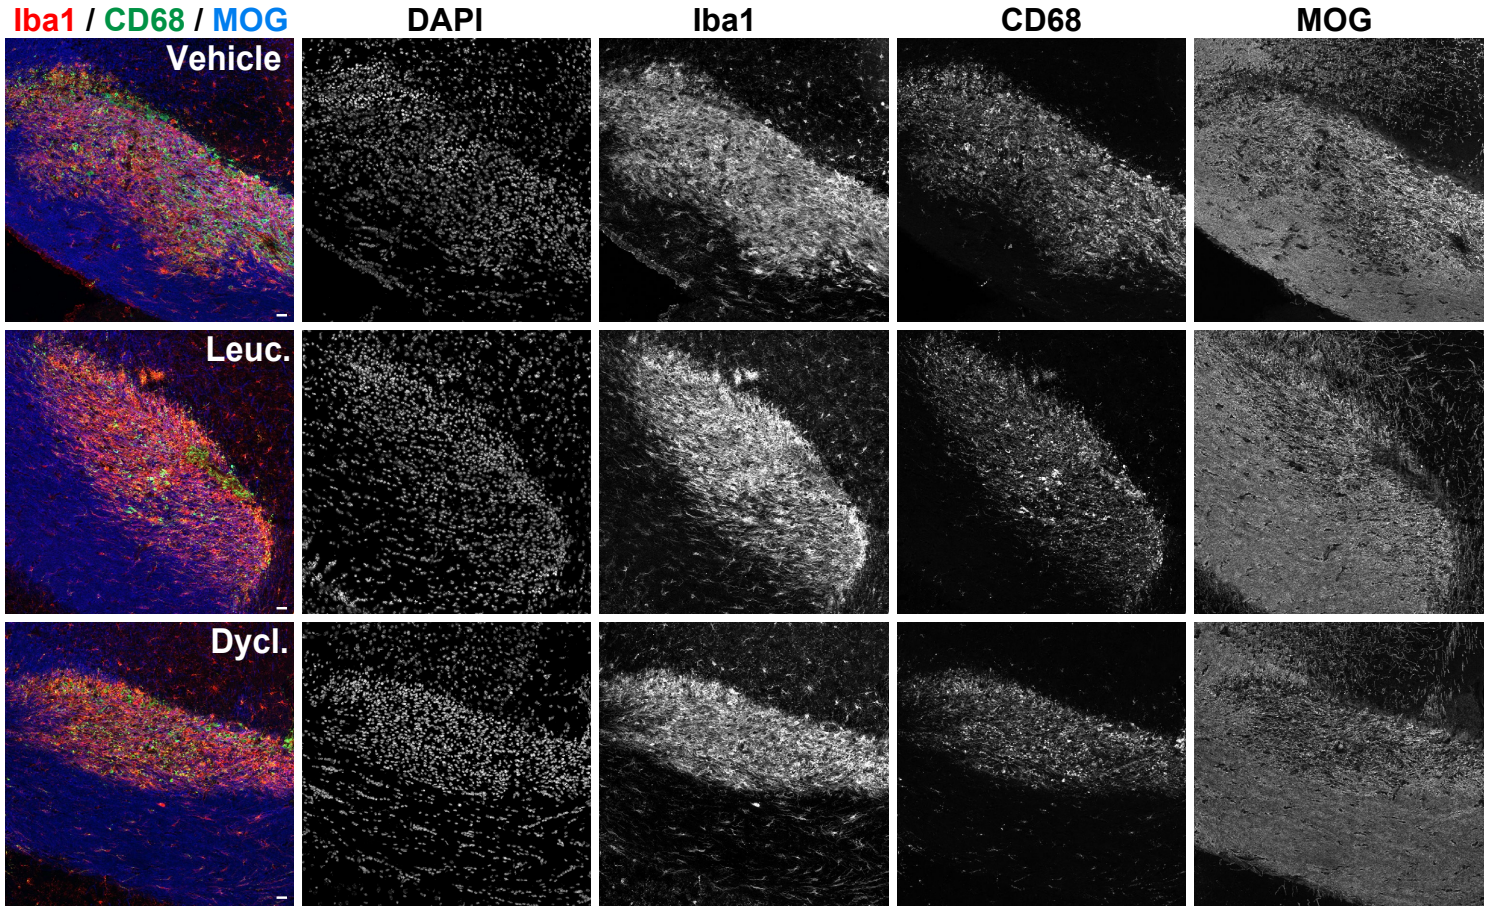**d**

Compound dose effect and clemastine comparison

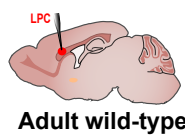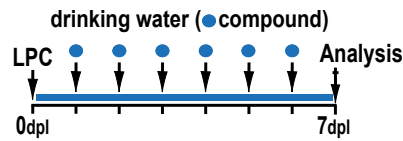**e**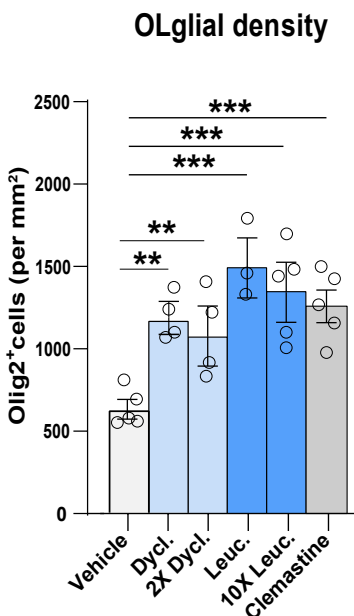**f**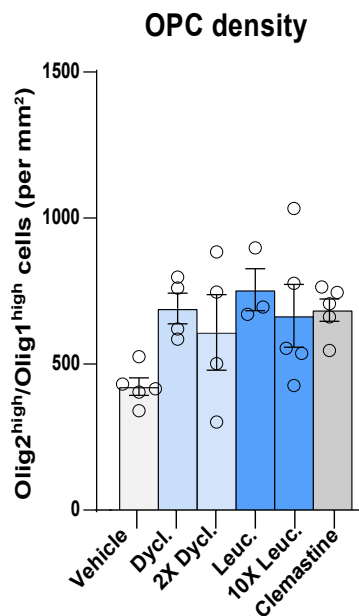**g**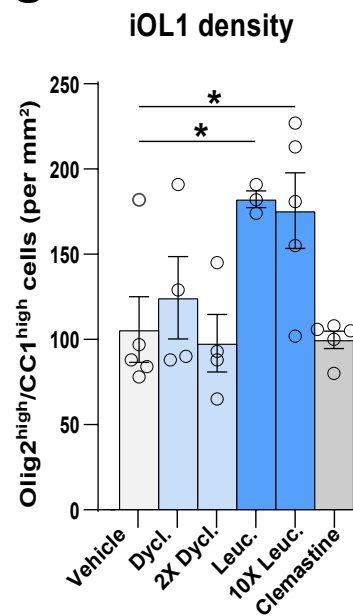**h**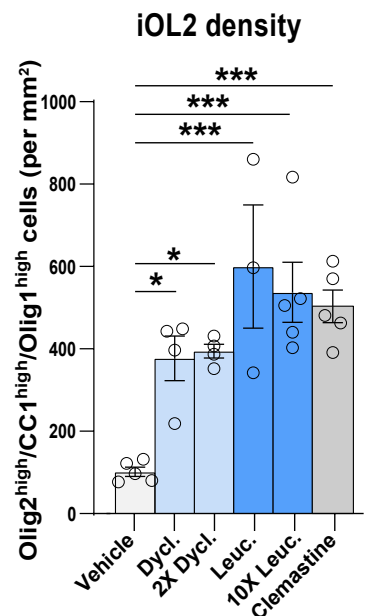

**Supplementary figure 8. Dyclonine and leucovorin promote both OPC proliferation and differentiation in a mouse model of adult demyelination.** (a) Schematics illustrating the protocol for LPC demyelination in the corpus callosum, the timing of compound administration in drinking water and analysis. (b) Quantification of drinking intake per day (ml) during treatment showing no difference between groups and thus confirming the expected compound dose administration. (c) Single channel panels for the immunofluorescence in the lesion site identified by cell density (DAPI), microglia/macrophages (Iba1<sup>+</sup> cells, red) and their phagocytic profile (CD68<sup>+</sup> cells, green), and the reduction in myelin immunodetection (MOG, blue) in different treatment conditions. (d) Schematics illustrating the protocol of a replicated experiment to that of figure 7, comparing different doses of leucovorin and dyclonine, and using clemastine as a pro-oligodendrogenic positive control. (e-h). Quantification of Olig2<sup>+</sup> oligodendroglial density (e), OPC density (f), iOL1 density (g) and iOL2 density (h) showing a similar increase at both doses tested of leucovorin and dyclonine in the density of oligodendroglia (Olig2<sup>+</sup> cells), iOL1s (only increased by leucovorin treatment), and iOL2s. Note that clemastine induces a similar effect to dyclonine, with only leucovorin increasing the density of iOL1s. Dycl., dyclonine; Leuc., leucovorin; 2X Dycl. 2-fold dyclonine dose; 10X Leuc., 10-fold leucovorin dose; Clem., clemastine. Data are presented as Mean ± SEM. Each dot corresponds to a biological replicate. Statistics were performed using One-way ANOVA to compare the cell counts across different treatments followed by Dunnett's test to compare each treatment with Vehicle (control group). \*p < 0.05; \*\*p < 0.01; \*\*\*p < 0.001. Exact p-values, sample sizes (represented in the dot plots), and source data are provided in the Source Data file and in Methods Table 3. Scale bars: 20 mm.



**a**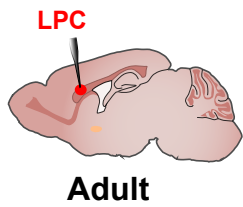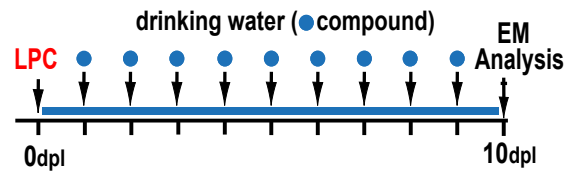**b**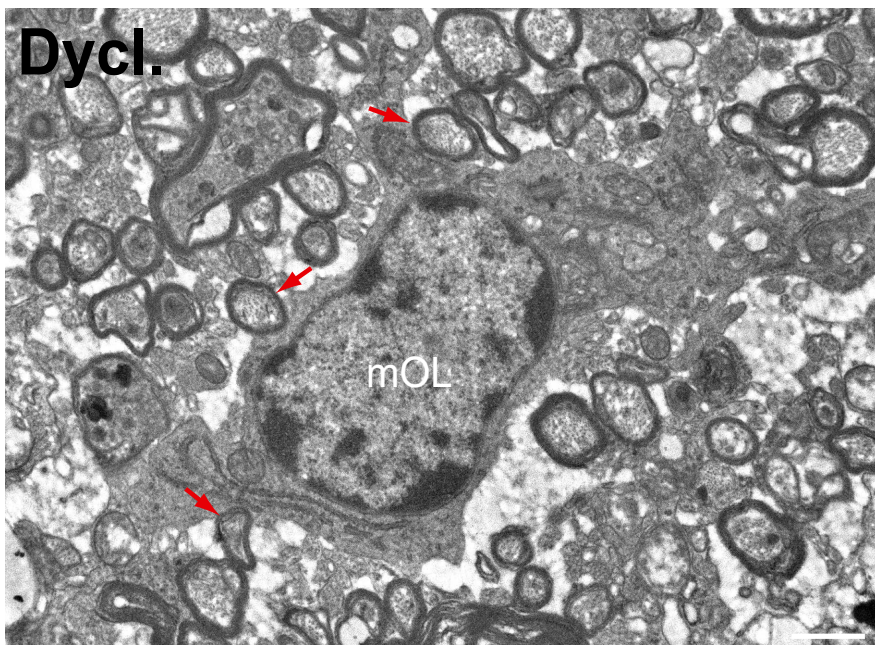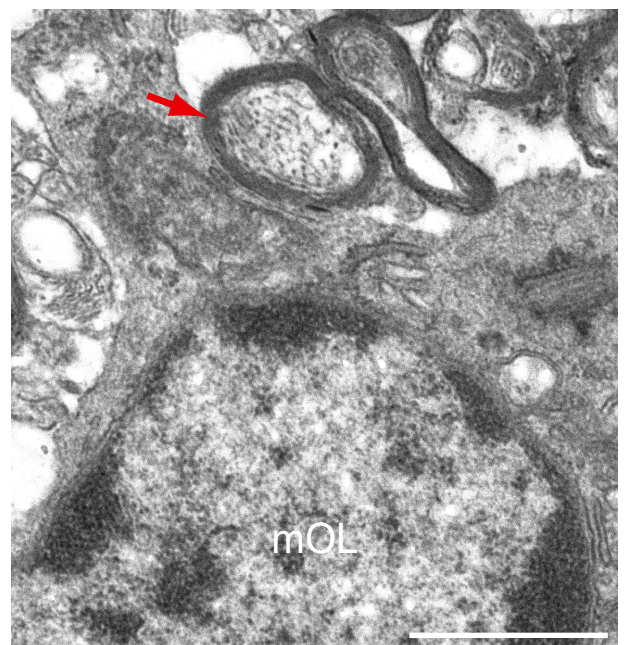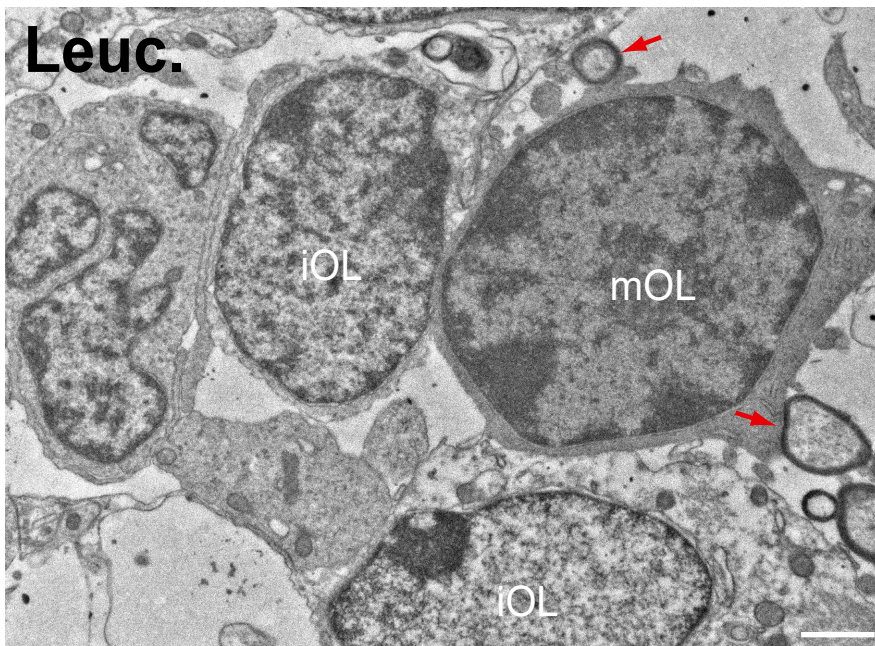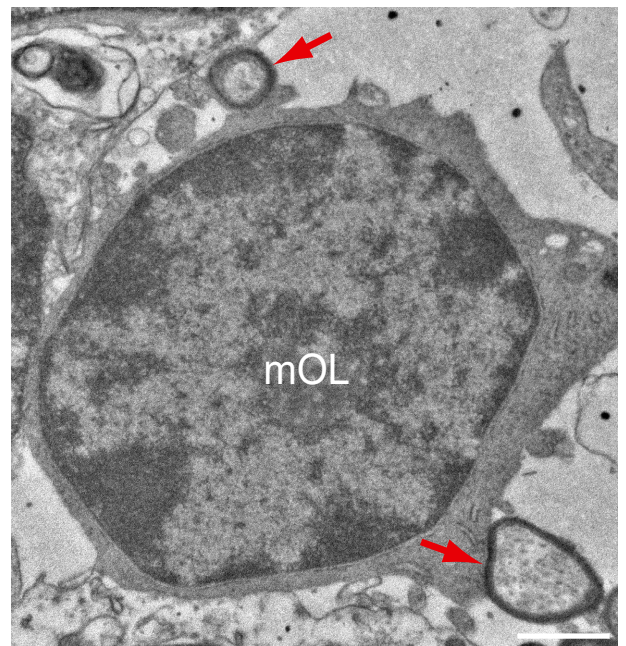

**Supplementary figure 9. Leucovorin and dyclonine accelerate the generation of myelinating oligodendrocytes in a mouse model of adult demyelination.** (a) Schematics illustrating the protocol used for compounds' administration in the drinking water and ultrastructural analysis by EM at 10 days post-lesion (dpl). (b) High magnification micrographs illustrating newly formed (re)myelinating OLs (mOL) in the lesion area, identified by their typical ultrastructural traits, i.e., oval-shape nucleus having densely packed chromatin with several heterochromatin spots and large cytoplasm in continuity with axons presenting compact myelin ultrastructure (red arrows) in dyclonine- and leucovorin-treated animals. Two examples of immature OLs (iOL), characterized by less compacted chromatin (lighter nuclear contrast than mOLs) and large cytoplasmic processes, are also shown in the bottom-left panel. The right panels show higher magnifications to better visualize the continuity between the OL cytoplasm and the myelinated axons (red arrows). Dycl., dyclonine; Leuc., leucovorin. Scale bars: 1  $\mu$ m.

## Reference BBB.

|       |                                                                                                                                                                                                     |
|-------|-----------------------------------------------------------------------------------------------------------------------------------------------------------------------------------------------------|
| S8-1  | Li, H. et al. <i>Journal of Chemical Information and Modeling</i> , 45(5), 1376-1384.                                                                                                               |
| S8-2  | Majumdar, S. et al. <i>Molecular Informatics</i> , 38(8-9), 1800164.                                                                                                                                |
| S8-3  | Chico, L. K. et al. <i>Nature reviews Drug discovery</i> , 8(11), 892-909.                                                                                                                          |
| S8-4  | Michelot J et al; <i>Biopharm Drug Dispos</i> 7: 197-206 (1986)                                                                                                                                     |
| S8-5  | Martins, I. F. et al. <i>Journal of chemical information and modeling</i> , 52(6), 1686-1697.                                                                                                       |
| S8-6  | Ghose, A. K. et al. <i>ACS chemical neuroscience</i> , 3(1), 50-68.                                                                                                                                 |
| S8-7  | Harvard Dataverse,<br><a href="https://dataverse.harvard.edu/dataset.xhtml?persistentId=doi:10.7910/DVN/21LKWG">https://dataverse.harvard.edu/dataset.xhtml?persistentId=doi:10.7910/DVN/21LKWG</a> |
| S8-8  | Kortagere, S. et al; <i>Pharmaceutical research</i> , 25, 1836–1845 (2008)25(8), 1836.                                                                                                              |
| S8-9  | Andres, C. et al. <i>QSAR &amp; Combinatorial Science</i> , 25(4), 305-309.                                                                                                                         |
| S8-10 | Gupta, M. et al; <i>Journal of medicinal chemistry</i> , 62(21), 9824-9836.                                                                                                                         |
| S8-11 | <a href="https://www.boehringerone.com">https://www.boehringerone.com</a> (Monography BERODUAL®)                                                                                                    |
| S8-12 | Shi M. <i>J Neurotrauma</i> . 2022 Sep;39(17-18):1240-1261.                                                                                                                                         |
| S8-13 | Madgula VL. Et al; <i>Planta Med</i> . 2010 Apr;76(6):599-606.                                                                                                                                      |
| S8-14 | Subramanian, G. et al. <i>Journal of Computer-Aided Molecular Design</i> , (2003), 17(10), 643-664.                                                                                                 |
| S8-15 | Mu E, Kulkarni J. et al. <i>Aust Prescr</i> . 2022 Jun;45(3):75-79.                                                                                                                                 |
| S8-16 | Zhang JX, et al ; <i>Molecules</i> . 2017 Feb 24;22(3):334.                                                                                                                                         |
| S8-17 | Adenot, M. et al. <i>Journal of chemical information and computer sciences</i> , 2004, 44(1), 239-248.                                                                                              |
| S8-18 | Tan DX. Et al. <i>Curr Neuropharmacol</i> . 2010 Sep;8(3):161.                                                                                                                                      |
| S8-19 | Youdim KA et al. <i>Free Radic Biol Med</i> . 2004 Mar 1;36(5):592-604.                                                                                                                             |
| S8-20 | Drugbanks : <a href="https://www.drugbank.ca/drugs/DB11632">https://www.drugbank.ca/drugs/DB11632</a>                                                                                               |
| S8-21 | Shelmire B. <i>AMA Arch Derm</i> . 1955;71(6):728–730.                                                                                                                                              |
| S8-22 | Schwarz T. et al. <i>Chem Med Chem</i> 2016,11,1380–1394                                                                                                                                            |
| S8-23 | Mochizuki T et al. <i>Brain Res</i> . 1996 Dec 16;743(1-2):178-83.                                                                                                                                  |
| S8-24 | Ishizaki J et al; <i>Biol Pharm Bull</i> 21 (1): 67-71(1998)                                                                                                                                        |
| S8-25 | Parry GJ et al. <i>Clin Neuropharmacol</i> . 2010 Jan-Feb;33(1):17-21.                                                                                                                              |
| S8-26 | Schutta H.S. et al. <i>The Journal of Pediatrics</i> . Vol. 75, No. 6, part 1, pp. 1070-1079                                                                                                        |
| S8-27 | The European Agency for the Evaluation of Medicinal Products. EMEA/MRL/256/97-FINAL. October 1997                                                                                                   |
| S8-28 | Quinn M. et al. <i>Dig Liver Dis</i> . 2014 Jun; 46(6):527-34.                                                                                                                                      |
